# Supplementary material
Source: PubMed Central journal article supplement (PMC6659009)
Supplement: ao7b00702_si_001.pdf [file ao7b00702_si_001.pdf]

## Supporting Information

### **Co<sub>3</sub>O<sub>4</sub> nanowires on flexible carbon fabric as a binder free electrode for all solid state symmetric supercapacitor**

Promita Howli<sup>1#</sup>, Swati Das<sup>2</sup>, Samrat Sarkar<sup>2</sup>, Madhupriya Samanta<sup>2</sup>, Karamjyoti Panigrahi<sup>2</sup>,  
Nirmalya Sankar Das<sup>2§</sup> and Kalyan Kumar Chattopadhyay<sup>1,2\*</sup>

<sup>1</sup>Department of Physics, Jadavpur University, Kolkata-700032, India

<sup>2</sup>School of Materials Science and Nanotechnology, Jadavpur University, Kolkata-700032,  
India

<sup>#</sup>Present Adress - Department of Physics, Prabhu Jagatbandhu College, Jhorhat, Andul,  
Howrah- 711302

<sup>§</sup>Present Adress - Department of Basic Science and Humanities, Techno India - Batanagar,  
Kolkata 700141, India.

\*email address: [kalyan\\_chattopadhyay@yahoo.com](mailto:kalyan_chattopadhyay@yahoo.com), Tel.: +91 33 2413 8917;

[Fax: +91 33 2414 6007](tel:+913324146007)

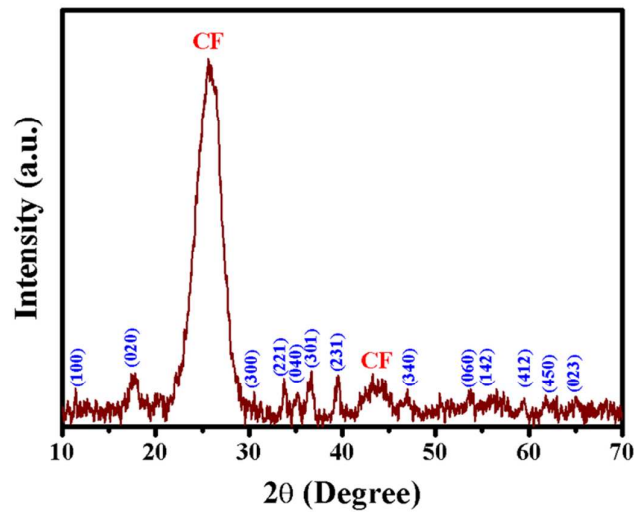

Figure S1: XRD pattern of the Cobalt-hydroxide-carbonate on carbon fabric.

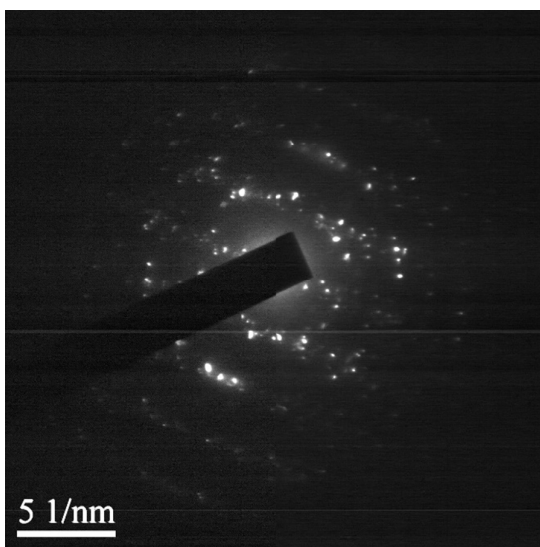

Figure S2: SAED pattern of the Cobalt-hydroxide-carbonate, clearly indicate the polycrystalline nature.

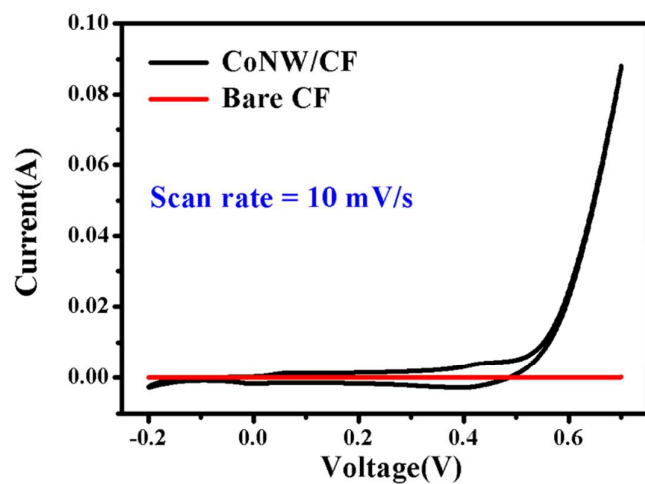

Figure S3: Cyclic Voltammetry curve of CoNW/CF electrode and bare carbon fabric at scan rate 10 mV/sec.

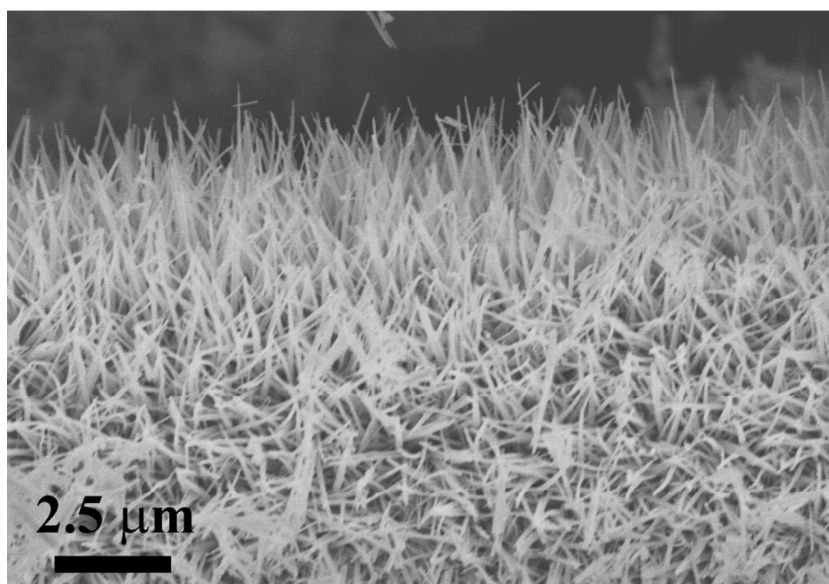

Figure S4: FESEM image of CoNW/CF electrode after 2000 cycles.

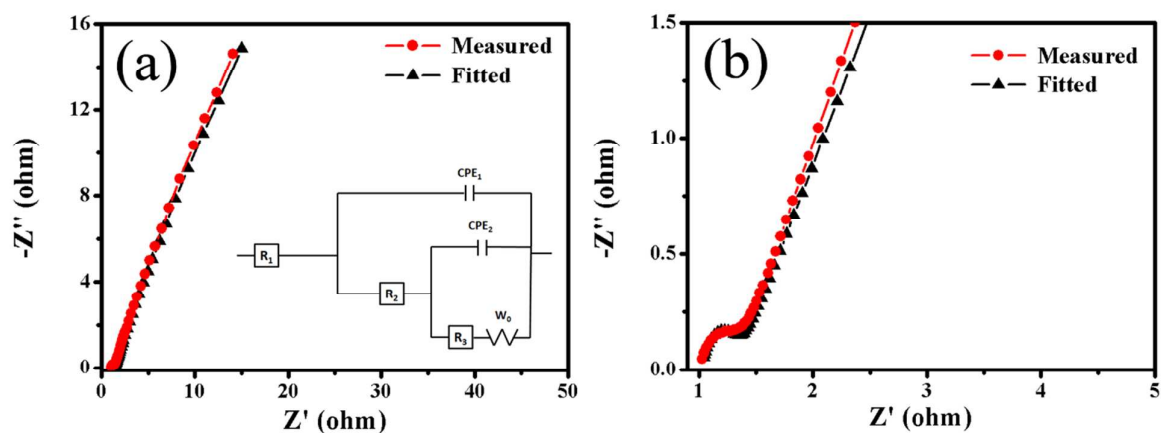

Figure S5: (a) Nyquist plot of CoNW/CF electrode in three electrode system with 3M KOH aqueous electrolyte with fitted curve. Inset is the electrical equivalent circuit used to fit the experimental data of CoNW/CF electrode. (b) Semicircle at the high frequency region.

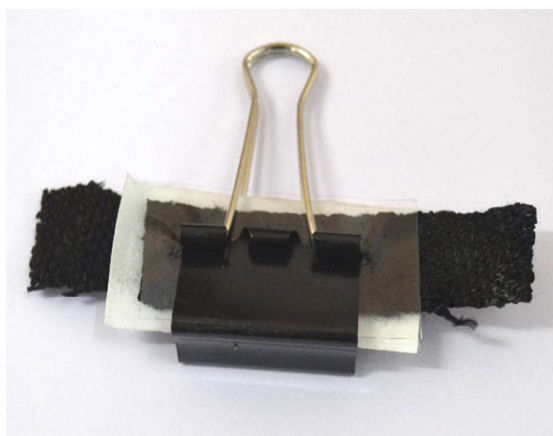

Figure S6: Digital image of the SSC device made of by two CoNW/CF electrodes, separated with PVA/KOH gel electrolyte and filter paper. Photograph courtesy of 'Promita Howli'. Copyright 2017.

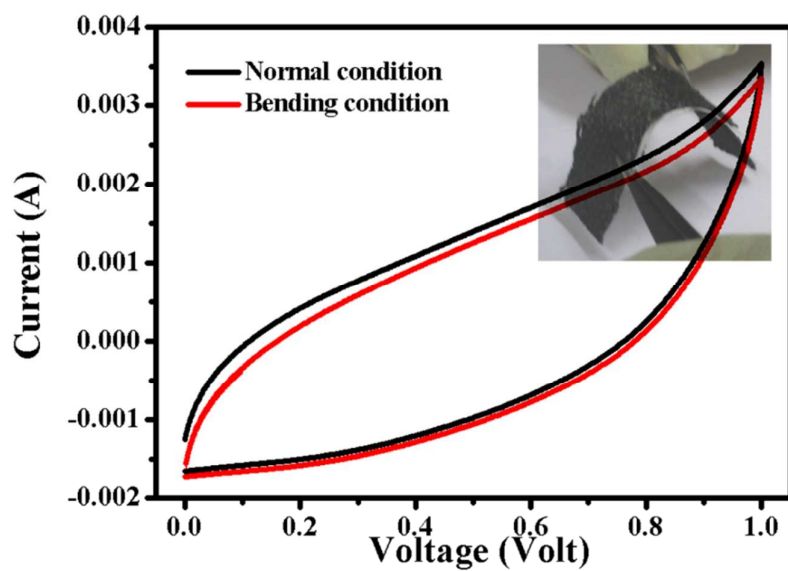

Figure S7: Cyclic voltammetry curve of SSC device at normal condition and bending condition at scan rate 50 mV/s.

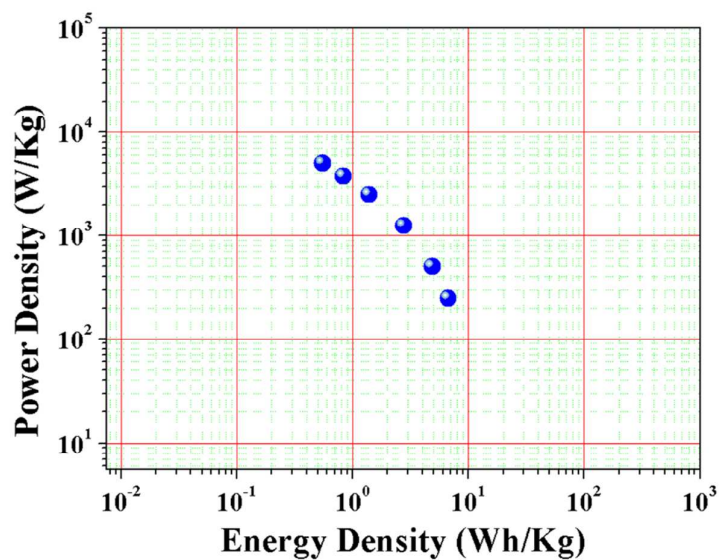

Figure S8: Gravimetric ragone plot of the SSC device.

**Formulae and calculations:**

**Calculation of Volumetric capacitance of SSC device:**

$$C_V = (I \times \Delta t) / (v \times \Delta V) \quad (\text{in mF cm}^{-3}) \quad (\text{when } I \text{ is in mA})$$

$v$  (in  $\text{cm}^3$ ) is the effective volume of SSC device.

**Volumetric ( $E_V$ ,  $P_V$ ) energy and power densities of SSC:**

$$E_V = C_V \times (\Delta V)^2 / 7.2 \quad (\text{in mWh cm}^{-3})$$

$$P_V = E_V \times 3600 / \Delta t \quad (\text{in mW cm}^{-3})$$

In all the calculations,  $\Delta V$  and  $\Delta t$  are in volt and second respectively.

**Gravimetric ( $E_S$ ,  $P_S$ ) energy and power densities of SSC:**

$$E_S = C_S \times (\Delta V)^2 / 7.2 \quad (\text{in Wh kg}^{-1})$$

$$P_S = E_S \times 3600 / \Delta t \quad (\text{in W kg}^{-1})$$

Where  $C_S = (I \times \Delta t) / (m \times \Delta V)$  (in  $\text{F g}^{-1}$ ) (when  $I$  is in mA and  $m$  is in mg)

is gravimetric capacitance of SSC device.
